# Supplementary material for: Combination of chemical etching of gold nanoclusters with aggregation-induced emission for preparation of new phosphors for the development of UV-driven phosphor-converted white light-emitting diodes
Source: Royal Society of Chemistry journal article supplement (doi:10.1039/c6tc04217a), 2016-01-01
Supplement: c6tc04217a1.pdf [file c6tc04217a1.pdf]

**Supporting Information**

**Combination of chemical etching of gold nanoclusters with  
aggregation-induced emission for preparation of new phosphors for  
development of UV-driven phosphor-converted white light-emitting  
diodes**

Xin Lu,<sup>a</sup> Tao Wang,<sup>a</sup> Tong Shu,<sup>b</sup> Xuanhui Qu,<sup>a</sup> Xueji Zhang,<sup>b</sup> Feng Liang,<sup>c</sup> and Lei Su<sup>b,\*</sup>

<sup>a</sup> Institute for Advanced Materials and Technology, University of Science and Technology Beijing, Beijing 100083, China.

<sup>b</sup> Beijing Key Laboratory for Bioengineering and Sensing Technology, Research Center for Bioengineering and Sensing Technology, School of Chemistry and Biological Engineering, University of Science and Technology Beijing, Beijing 100083, China.

<sup>c</sup> The State Key Laboratory of Refractories and Metallurgy, Wuhan University of Science and Technology, Wuhan 430081, China.

\* Corresponding Author. E-mail: [sulei@ustb.edu.cn](mailto:sulei@ustb.edu.cn).

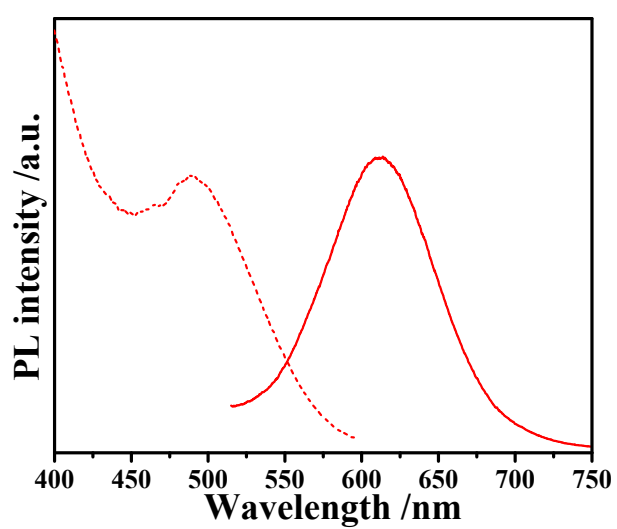

**Fig. S1** Photoluminescent excitation (dash line) and emission (solid line) spectra of the GNCs@BSA ( $\lambda_{\text{Ex}}$ : 490 nm).

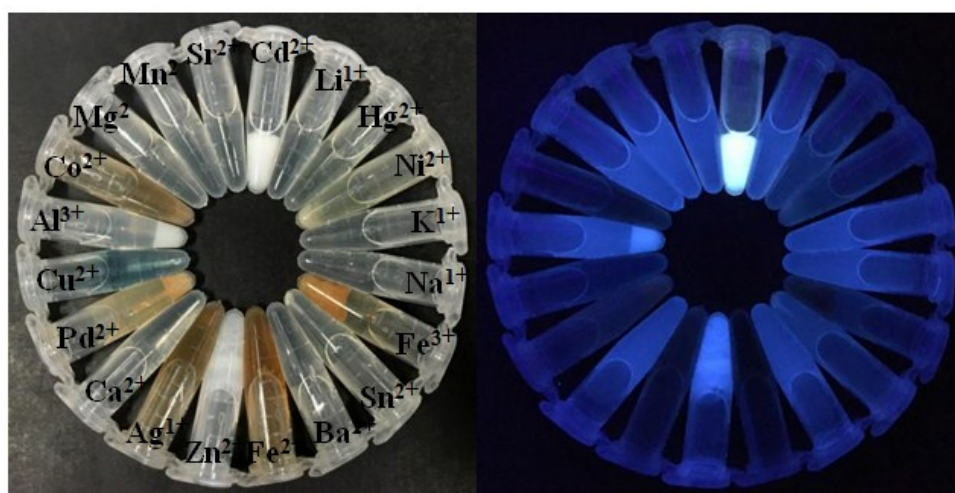

**Fig. S2** Photographs of the TCEP-Au(I)-BSA solutions in the presence of 5 mM cadmium ion and 19 kinds of other metal ions under visible light (left) and 365 nm UV light (right), respectively.

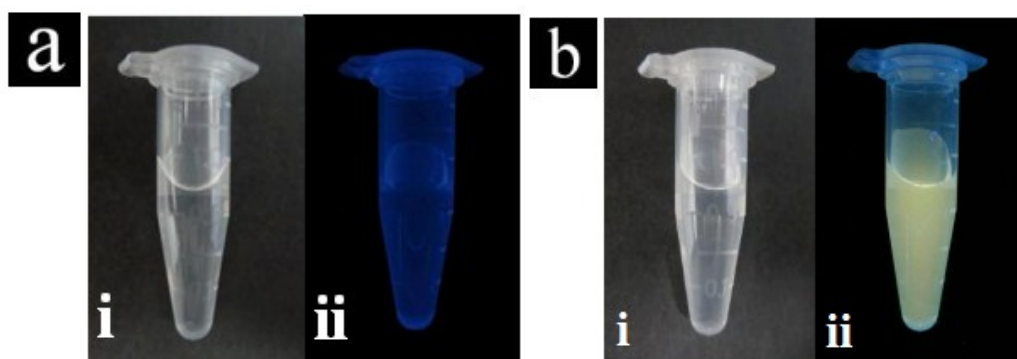

**Fig. S3** Photographs of the filtrate of the ultrafiltrated TCEP-Au(I)-BSA solution in the absence (a) and presence (b) of 5 mM cadmium ion under visible light (i) and 365 nm UV light (ii), respectively.

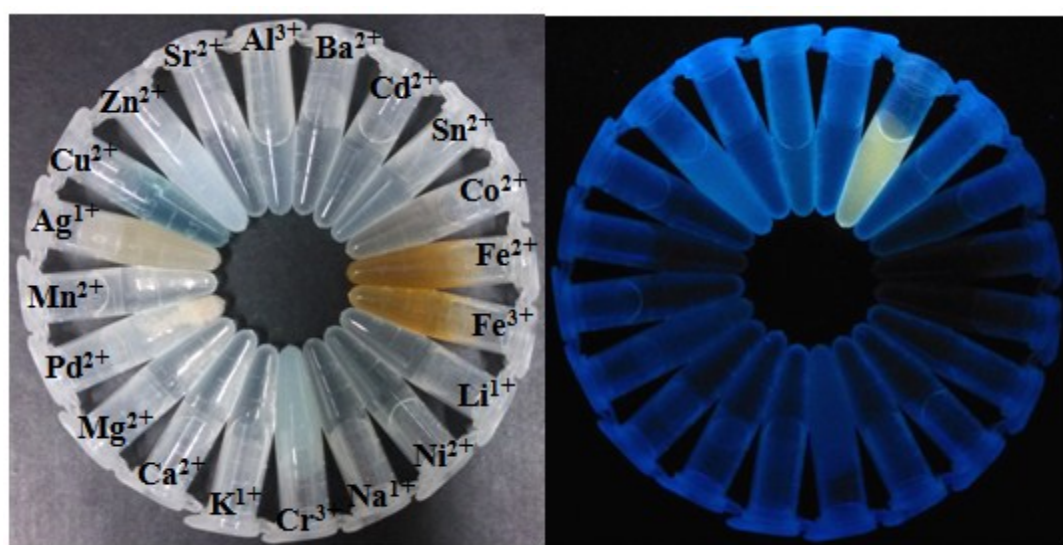

**Fig. S4** Photographs of the TCEP-Au(I) solutions in the presence of 5 mM cadmium ion and 19 kinds of other metal ions under visible light (left) and 365 nm UV light (right), respectively.
